**Dall & Wright Supplementary Information: Payoff Tables**

**Table 1:** payoffs to mutants playing row strategies against populations of  $n$  column strategists with a ‘dominance advantage’; i.e. for  $n < i = i_{crit}$

|           | SR                                                                                                                                                                                                                                                   | SD                                                                                                   | FR                                                                                                                                                                                                                                                   | FD                                                                                                                                |
|-----------|------------------------------------------------------------------------------------------------------------------------------------------------------------------------------------------------------------------------------------------------------|------------------------------------------------------------------------------------------------------|------------------------------------------------------------------------------------------------------------------------------------------------------------------------------------------------------------------------------------------------------|-----------------------------------------------------------------------------------------------------------------------------------|
| <b>SR</b> | $\frac{\left(1 + \left(-1 + 2^{\frac{n}{i}}\right) n\right) (1 - (1 - \lambda)^{1+n})}{1 + n}$                                                                                                                                                       | $\lambda$                                                                                            | $\frac{1}{(1+n)\gamma}$<br>$\left(\lambda \left(\frac{1 - (1-\gamma)^{1+n}}{1+n} + \frac{1}{1+n} \left(\left(-1 + 2^{\frac{n}{i}}\right) n (1+n+n^2 - (1-\gamma)^n (1+n+n^2-\gamma))\right) + n(\gamma + (-1 + (1-\gamma)^n) \lambda)\right)\right)$ | $\frac{\left(n + \frac{\left(-1 + 2^{\frac{n}{i}}\right) (1 - (1-\gamma)^{1+n})}{\gamma}\right) \lambda}{1+n}$                    |
| <b>SD</b> | $\lambda$                                                                                                                                                                                                                                            | $\lambda$                                                                                            | $\frac{\left(n + \frac{1 - (1-\gamma)^{1+n}}{\gamma}\right) \lambda}{1+n}$                                                                                                                                                                           | $\frac{\left(n + \frac{\left(1 + \left(-1 + 2^{\frac{n}{i}}\right) n\right) (1 - (1-\gamma)^{1+n})}{\gamma}\right) \lambda}{1+n}$ |
| <b>FR</b> | $\frac{1}{1+n} \left(\frac{1 - (1-\lambda)^{1+n}}{1+n} - \frac{1}{2} n(-2+\gamma) \lambda + \left(-1 + 2^{\frac{n}{i}}\right) n \left(1 + \frac{1 - (1-\lambda)^{1+n}}{1+n} - (1-\lambda)^{-1+n} + \lambda - \frac{\gamma \lambda}{2}\right)\right)$ | $\frac{1}{1+n} \left(\left(1 - \left(-1 + 2^{\frac{n}{i}}\right) n(-2+\gamma)\right) \lambda\right)$ | $\frac{\left(1 + \left(-1 + 2^{\frac{n}{i}}\right) n\right) (1 - (1-\gamma)^{1+n}) \lambda}{(1+n)\gamma}$                                                                                                                                            | $\frac{\left(-1 + 2^{\frac{n}{i}}\right) (1 - (1-\gamma)^{1+n}) \lambda}{\gamma}$                                                 |
| <b>FD</b> | $\frac{1}{(1+n)^2} \left(1 - (1-\lambda)^n + (1-\lambda)^n \left(\left(-1 + 2^{\frac{n}{i}}\right) n(-1+\lambda) + \lambda\right) + n \left(-1 + 2^{\frac{n}{i}} - (1+n) (-2+\gamma) \lambda\right)\right)$                                          | $\frac{\left(2 - 2^{\frac{n}{i}} n(-2+\gamma)\right) \lambda}{2(1+n)}$                               | $\frac{(1 - (1-\gamma)^{1+n}) \lambda}{\gamma}$                                                                                                                                                                                                      | $\frac{\left(1 + \left(-1 + 2^{\frac{n}{i}}\right) n\right) (1 - (1-\gamma)^{1+n}) \lambda}{(1+n)\gamma}$                         |

## Dall & Wright Supplementary Information: Payoff Tables

**Table 2:** payoffs to mutants playing row strategies against populations of  $n$  column strategists without a ‘dominance advantage’; i.e. for  $n \geq i =$

$i_{crit}$

|    | SR                                                                                                          | SD                                    | FR                                                                                                      | FD                                                                        |
|----|-------------------------------------------------------------------------------------------------------------|---------------------------------------|---------------------------------------------------------------------------------------------------------|---------------------------------------------------------------------------|
| SR | $1 - (1 - \lambda)^{1+n}$                                                                                   | $\lambda$                             | $\frac{(\lambda (1+n^2 + n\gamma - n\lambda + (1-\gamma)^n (-1+\gamma+n(-n+\lambda))))}{((1+n)\gamma)}$ | $\frac{\left(n + \frac{1-(1-\gamma)^{1+n}}{\gamma}\right) \lambda}{1+n}$  |
| SD | $\lambda$                                                                                                   | $\lambda$                             | $\frac{\left(n + \frac{1-(1-\gamma)^{1+n}}{\gamma}\right) \lambda}{1+n}$                                | $\frac{n\lambda}{1+n} + \frac{\lambda - (1-\gamma)^{1+n}\lambda}{\gamma}$ |
| FR | $\frac{((n+(-1+\lambda)^2)(1-\lambda)^n - (-1+\lambda)(-1+n(-1+(-2+\gamma)\lambda)))}{((1+n)(-1+\lambda))}$ | $\frac{(1-n(-2+\gamma))\lambda}{1+n}$ | $\frac{(1-(1-\gamma)^{1+n})\lambda}{\gamma}$                                                            | $\frac{(1-(1-\gamma)^{1+n})\lambda}{\gamma}$                              |
| FD | $-\frac{-1+(1-\lambda)^{1+n}+n(-2+\gamma)\lambda}{1+n}$                                                     | $\frac{(1-n(-2+\gamma))\lambda}{1+n}$ | $\frac{(1-(1-\gamma)^{1+n})\lambda}{\gamma}$                                                            | $\frac{(1-(1-\gamma)^{1+n})\lambda}{\gamma}$                              |
